# Supplementary material for: Efficacy of Ultrasound-Guided Serratus Anterior Plane Block for Postoperative Analgesia in Patients Undergoing Breast Surgery: A Systematic Review and Meta-Analysis of Randomised Controlled Trials
Source: Pain Res Manag. 2021 Oct 25;2021:7849623. doi: 10.1155/2021/7849623 (PMC8560299; doi:10.1155/2021/7849623)
Supplement: Supplementary Materials — Search strategies for other databases. . [file 7849623.f1.zip]

Archive with 2 entries (2 files):
- 7849623.f1/PRISMA Checklist.doc
- 7849623.f1/Supplemental Material.docx
